# Supplementary material for: Molecular phylogenetic analysis of new Entoloma rhodopolium-related species in Japan and its identification method using PCR-RFLP
Source: PubMed Central journal article supplement (PMC5668239; doi:10.1038/s41598-017-14466-x), 2017-11-02
Supplement: 41598_2017_14466_MOESM1_ESM.pdf [file 41598_2017_14466_MOESM1_ESM.pdf]

(Supplemental Information)

**Molecular phylogenetic analysis of new *Entoloma rhodopolium*-related species in Japan and its identification method using PCR-RFLP.**

Kazunari Kondo<sup>1,\*</sup>, Kosuke Nakamura<sup>1</sup>, Takumi Ishigaki<sup>1</sup>, Kozue Sakata<sup>1</sup>, Saemi Obitsu<sup>1</sup>, Akio Noguchi<sup>1</sup>, Nozomi Fukuda<sup>1</sup>, Eiji Nagasawa<sup>2</sup>, Reiko Teshima<sup>3</sup>, Tomoko Nishimaki-Mogami<sup>1</sup>

<sup>1</sup>*Division of Biochemistry, National Institute of Health Sciences*

*1-18-1 Kamiyoga, Setagaya, Tokyo 158-0098, Japan*

<sup>2</sup>*The Tottori Mycological Institute*

*211 Kokoge, Tottori-shi, Tottori 689-1125 Japan*

<sup>3</sup>*Pharmaceuticals and Medical Devices Agency*

*3-3-2 Kasumigaseki, Chiyoda-ku, Tokyo 100-0013 Japan*

<sup>\*</sup>, Corresponding author. Current address: Division of Biochemistry, National Institute of Health Sciences, 1-18-1 Kamiyoga, Setagaya, Tokyo 1588501, Japan.

Tel.:+81-3-3700-9478, Fax.: +81-3-3707-6950.

**Table 1S** Mushroom samples collected in this study.

| sample name | location        | year      | morphologically | Accession #                 |          |          |
|-------------|-----------------|-----------|-----------------|-----------------------------|----------|----------|
|             |                 |           |                 | ITS                         | RPB2     |          |
| KUB 1       | frozen          | Yamagata  | 2010            | <i>Entoloma rhodopolium</i> | LC088033 | LC148032 |
| KUB 2       | frozen          | Yamagata  | 2010            | <i>Entoloma rhodopolium</i> | LC088034 | LC148033 |
| KUB 3       | freeze-dried    | Yamagata  | 2010            | <i>Entoloma rhodopolium</i> | LC088035 | LC148034 |
| KUB 4       | freeze-dried    | Shimane   | 2008            | <i>Entoloma rhodopolium</i> | —        | —        |
| KUB 5       | freeze-dried    | Shimane   | 2008            | <i>Entoloma rhodopolium</i> | LC088036 | LC148035 |
| KUB 6       | freeze-dried    | Shimane   | 2008            | <i>Entoloma rhodopolium</i> | LC088037 | LC148036 |
| KUB 7       | freeze-dried    | Shimane   | 2008            | <i>Entoloma rhodopolium</i> | LC088038 | LC148037 |
| KUB 8       | freeze-dried    | Shimane   | 2008            | <i>Entoloma rhodopolium</i> | —        | —        |
| KUB 9       | freeze-dried    | Shimane   | 2008            | <i>Entoloma rhodopolium</i> | LC088039 | LC148038 |
| KUB 10      | freeze-dried    | Shimane   | 2008            | <i>Entoloma rhodopolium</i> | LC088040 | —        |
| KUB 11      | freeze-dried    | Shimane   | 2008            | <i>Entoloma rhodopolium</i> | —        | —        |
| KUB 101     | frozen          | Niigata   | 2011            | <i>Entoloma rhodopolium</i> | LC088041 | LC148039 |
| KUB 102     | frozen          | Niigata   | 2011            | <i>Entoloma rhodopolium</i> | LC088042 | LC148040 |
| KUB 103     | frozen          | Hokkaido  | 2011            | <i>Entoloma rhodopolium</i> | —        | —        |
| KUB 104     | frozen          | Tokyo     | 2011            | <i>Entoloma rhodopolium</i> | LC088043 | LC148041 |
| KUB 105     | frozen          | Tokyo     | 2011            | <i>Entoloma rhodopolium</i> | LC088044 | —        |
| KUB 106     | frozen          | Tokyo     | 2011            | <i>Entoloma rhodopolium</i> | LC088045 | LC148042 |
| KUB 107     | frozen          | Tokyo     | 2011            | <i>Entoloma rhodopolium</i> | LC088046 | —        |
| KUB 108     | frozen          | Tokyo     | 2011            | <i>Entoloma rhodopolium</i> | LC088047 | —        |
| KUB 109     | frozen          | Tokyo     | 2011            | <i>Entoloma rhodopolium</i> | LC088048 | —        |
| KUB 110     | frozen          | Tokyo     | 2011            | <i>Entoloma rhodopolium</i> | LC088049 | —        |
| KUB 111     | frozen          | Tokyo     | 2011            | <i>Entoloma rhodopolium</i> | LC088050 | —        |
| KUB 112     | frozen          | Tokyo     | 2011            | <i>Entoloma rhodopolium</i> | —        | —        |
| KUB 113     | frozen          | Tokyo     | 2011            | <i>Entoloma rhodopolium</i> | LC088051 | —        |
| KUB 114     | frozen          | Tokyo     | 2011            | <i>Entoloma rhodopolium</i> | LC088052 | —        |
| KUB 121     | dried, specimen | Tottori   | 2007            | <i>Entoloma rhodopolium</i> | —        | —        |
| KUB 122     | dried, specimen | Tottori   | 2007            | <i>Entoloma rhodopolium</i> | —        | —        |
| KUB 123     | dried, specimen | Tottori   | 2007            | <i>Entoloma rhodopolium</i> | LC088053 | —        |
| KUB 124     | dried, specimen | Tottori   | 2007            | <i>Entoloma rhodopolium</i> | LC088054 | —        |
| KUB 125     | dried, specimen | Okayama   | 2008            | <i>Entoloma rhodopolium</i> | —        | —        |
| KUB 126     | dried, specimen | Tottori   | 2008            | <i>Entoloma rhodopolium</i> | LC088055 | —        |
| KUB 127     | dried, specimen | Tottori   | 2008            | <i>Entoloma rhodopolium</i> | LC088056 | —        |
| KUB 128     | dried, specimen | Tottori   | 2008            | <i>Entoloma rhodopolium</i> | LC088057 | —        |
| KUB 129     | dried, specimen | Tottori   | 2008            | <i>Entoloma rhodopolium</i> | —        | —        |
| KUB 130     | dried, specimen | Tottori   | 2010            | <i>Entoloma rhodopolium</i> | LC088058 | LC148043 |
| KUB 131     | dried, specimen | Tottori   | 2010            | <i>Entoloma rhodopolium</i> | —        | —        |
| KUB 132     | dried, specimen | Tottori   | 2008            | <i>Entoloma rhodopolium</i> | LC088059 | LC148044 |
| KUB 133     | dried, specimen | Tottori   | 2008            | <i>Entoloma sarcopum</i>    | LC088060 | —        |
| KUB 134     | dried, specimen | Tottori   | 2010            | <i>Entoloma sarcopum</i>    | LC088061 | —        |
| KUB 135     | dried, specimen | Tottori   | 2009            | <i>Entoloma sarcopum</i>    | —        | —        |
| KUB 136     | dried, specimen | Tottori   | 2008            | <i>Entoloma sarcopum</i>    | LC088062 | —        |
| KUB 201     | frozen          | Yamagata  | 2012            | <i>Entoloma sarcopum</i>    | LC088063 | —        |
| KUB 202     | frozen          | Yamagata  | 2012            | <i>Entoloma sarcopum</i>    | LC088064 | LC148045 |
| KUB 203     | frozen          | Fukushima | 2012            | <i>Entoloma sarcopum</i>    | LC088065 | LC148046 |
| KUB 204     | frozen          | Tochigi   | 2010            | <i>Entoloma sarcopum</i>    | LC088066 | LC148047 |
| KUB 205     | frozen          | Tochigi   | 2010            | <i>Entoloma sarcopum</i>    | LC088067 | LC148048 |
| KUB 206     | frozen          | Yamagata  | 2012            | <i>Entoloma sinuatum?</i>   | LC088068 | —        |
| KUB 207     | frozen          | Hokkaido  | 2012            | <i>Entoloma sinuatum?</i>   | LC088069 | —        |

(-), sequences were not obtained

| <b>Table 2S</b> Datasets used for molecular phylogenetic study. |                    |                    |          |
|-----------------------------------------------------------------|--------------------|--------------------|----------|
| <b>Data name</b>                                                |                    | <b>Accession #</b> |          |
|                                                                 |                    | ITS                | RPB2     |
| <i>Entoloma bisporigerum</i>                                    | KK76-14            | LN850532           | —        |
| <i>Entoloma bisporigerum</i>                                    | KK1604-12          | LN850533           | LN850681 |
| <i>Entoloma bisporigerum</i>                                    | KK106-02           | LN850534           | LN850682 |
| <i>Entoloma bisporigerum</i>                                    | KK934-03           | LN850535           | —        |
| <i>Entoloma bisporigerum</i>                                    | transvenosum var   | LN850538           | LN850683 |
| <i>Entoloma borgenii</i>                                        | KK135-10           | LN850522           | —        |
| <i>Entoloma borgenii</i>                                        | KK304-06           | LN850520           | —        |
| <i>Entoloma borgenii</i>                                        | KK681-03           | LN850521           | —        |
| <i>Entoloma borgenii</i>                                        | KK307-05           | LN850519           | LN850680 |
| <i>Entoloma borgenii</i>                                        | KK458-07           | LN850523           | —        |
| <i>Entoloma boreale</i>                                         | holoKK106-09       | LN850624           | LN850697 |
| <i>Entoloma boreale</i>                                         | KK257-08           | LN850622           | —        |
| <i>Entoloma boreale</i>                                         | KK158-11           | LN850623           | —        |
| <i>Entoloma eminens</i>                                         | holoKK417-12       | LN850584           | —        |
| <i>Entoloma eminens</i>                                         | KK40-14            | LN850583           | —        |
| <i>Entoloma griseopruinatum</i>                                 | KK295-12           | LN850590           | —        |
| <i>Entoloma griseopruinatum</i>                                 | KK1607-12          | LN850588           | —        |
| <i>Entoloma insitatum</i>                                       | KK3-12             | LN850542           | —        |
| <i>Entoloma insitatum</i>                                       | topoM.Enderle6     | LN850543           | —        |
| <i>Entoloma lupinum</i>                                         | holoKK13-14JVauras | LN850570           | LN850695 |
| <i>Entoloma lupinum</i>                                         | KK126-05           | LN850569           | —        |
| <i>Entoloma majaloides</i>                                      | KK782-12           | LN850478           | LN850654 |
| <i>Entoloma majaloides</i>                                      | KK887-06JVauras    | LN850479           | LN850655 |
| <i>Entoloma majaloides</i>                                      | KK405-09           | LN850482           | LN850660 |
| <i>Entoloma majaloides</i>                                      | KK54-14            | LN850488           | LN850667 |
| <i>Entoloma majaloides</i>                                      | KK124-08JVauras    | LN850483           | LN850662 |
| <i>Entoloma nidorosum</i>                                       | KK268-08           | LN850501           | LN850672 |
| <i>Entoloma nidorosum</i>                                       | KK419-12           | LN850503           | LN850673 |
| <i>Entoloma nidorosum</i>                                       | KK1670-12          | LN850504           | LN850671 |
| <i>Entoloma nidorosum</i>                                       | KK415-12           | LN850502           | —        |
| <i>Entoloma nidorosum</i>                                       | JHP380             | LN850509           | —        |
| <i>Entoloma nidorosum</i>                                       | KK343b-09          | LN850505           | LN850675 |
| <i>Entoloma nidorosum</i>                                       | KK381-08           | LN850506           | LN850674 |
| <i>Entoloma nidorosum</i>                                       | J.Ateva26          | LN850507           | LN850676 |
| <i>Entoloma rhodopolium</i>                                     | KK157-14           | LN850496           | —        |
| <i>Entoloma rhodopolium</i>                                     | KK1664-12          | LN850497           | LN850705 |
| <i>Entoloma rhodopolium</i>                                     | neoKK213-14        | LN850494           | LN850669 |
| <i>Entoloma rhodopolium</i>                                     | K.Alho24           | LN850498           | —        |
| <i>Entoloma rhodopolium</i>                                     | KK177-14           | LN850495           | LN850670 |
| <i>Entoloma</i> aff. <i>rhodopolium</i>                         | KK24-07            | LN850499           | —        |
| <i>Entoloma</i> aff. <i>rhodopolium</i>                         | PH                 | LN850500           | —        |
| <i>Entoloma rhodopolium</i>                                     | Er-1               | AB301602           | —        |
| <i>Entoloma sarcopum</i>                                        | EC-3               | AB301603           | —        |
| <i>Entoloma sericatum</i>                                       | KK101-02           | LN850446           | LN850637 |
| <i>Entoloma sericatum</i>                                       | KK691-06           | LN850452           | LN850635 |
| <i>Entoloma sericatum</i>                                       | KK691-06           | LN850452           | LN850635 |
| <i>Entoloma sinuatum</i>                                        | st45               | KC710108           | —        |
| <i>Entoloma sinuatum</i>                                        | st182              | KC710116           | —        |
| <i>Entoloma sinuatum</i>                                        | H6003960           | GU373512           | —        |
| <i>Entoloma sinuatum</i>                                        | TJB5349            | DQ486700           | —        |
| <i>Entoloma</i> sp                                              | MLS007             | GQ397994           | —        |
| uncultured ectomycorrhizal fungus                               |                    | AB587746           | —        |
| <i>Clitocybe dealbata</i>                                       | 11212              | JF907804           | DQ825407 |
| <i>Lyophyllum leucopaeatum</i>                                  | Hae251-97          | AF357032           | DQ367434 |

*E. lacus* clade-I  
KUB-108

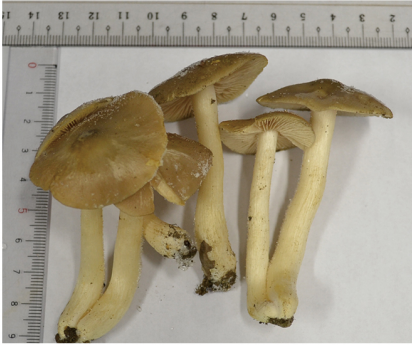

*E. subrhodopolium* clade-II  
KUB-130

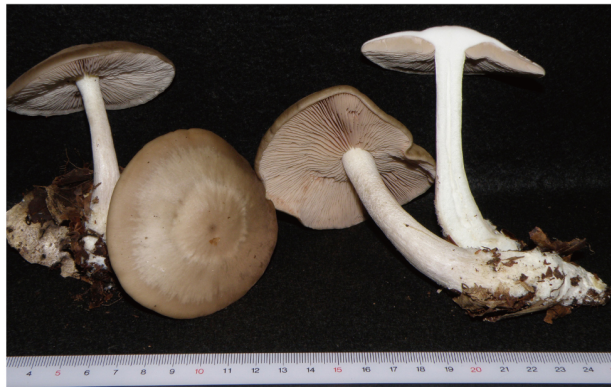

*E. pseudorhodopolium* clade-III  
KUB-7

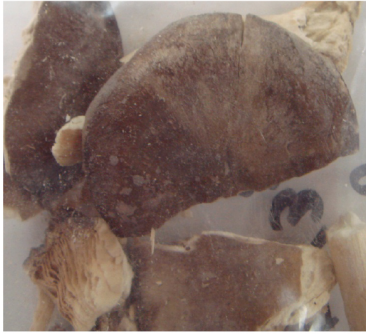

KUB-8

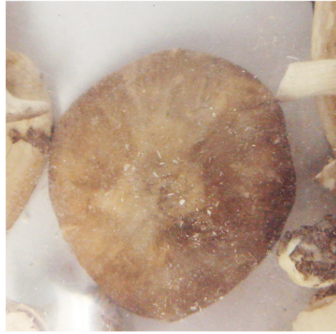

**Figure 1S.** Photographs of other samples from Japanese *Entoloma rhodopolium* clades.

*E. subrhodopolium*

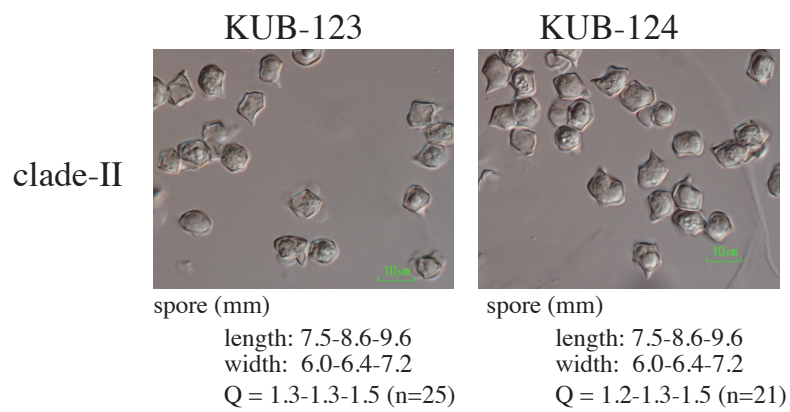

*E. pseudorhodopolium*

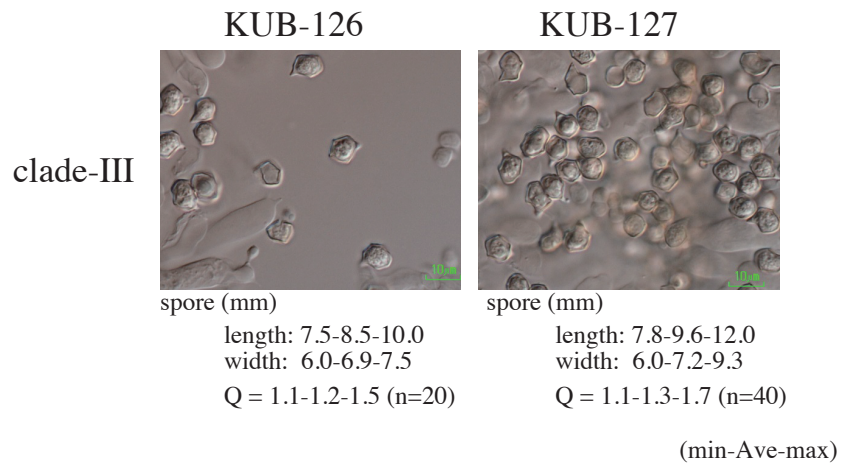

**Figure 2S.** Photographs of spores from Japanese *Entoloma rhodopolium* clades-II and III.

*p*-distance between known species

(a)

|                                 | <i>E.sinuatum</i> |       |       | <i>E.subsinuatum</i> |       |       |   |
|---------------------------------|-------------------|-------|-------|----------------------|-------|-------|---|
|                                 | 1                 | 2     | 3     | 4                    | 5     | 6     | 7 |
| 1 <i>E.sinuatum</i> _st45       |                   |       |       |                      |       |       |   |
| 2 <i>E.sinuatum</i> _st182      | 0.000             |       |       |                      |       |       |   |
| 3 <i>E.sinuatum</i> _H6003960   | 0.000             | 0.000 |       |                      |       |       |   |
| 4 <i>subsinuatum</i> _624       | 0.037             | 0.037 | 0.037 |                      |       |       |   |
| 5 <i>subsinuatum</i> _2269      | 0.026             | 0.026 | 0.026 | 0.011                |       |       |   |
| 6 <i>subsinuatum</i> _2005100   | 0.025             | 0.025 | 0.025 | 0.011                | 0.000 |       |   |
| 7 <i>E.subsinuatum</i> _TJB5349 | 0.029             | 0.029 | 0.029 | 0.014                | 0.002 | 0.002 |   |

2.9 ± 0.5 (%)  
(*sinuatum* vs *subsinuatum*)

|                                      | <i>E.nidorosum</i> |       |       |       |       |       |       | <i>E.rhodopolium</i> |       |       |       |       |    |
|--------------------------------------|--------------------|-------|-------|-------|-------|-------|-------|----------------------|-------|-------|-------|-------|----|
|                                      | 1                  | 2     | 3     | 4     | 5     | 6     | 7     | 8                    | 9     | 10    | 11    | 12    | 13 |
| 1 <i>nidorosum</i> _JAteva26VIII2001 |                    |       |       |       |       |       |       |                      |       |       |       |       |    |
| 2 <i>nidorosum</i> _KK343b-09        | 0.000              |       |       |       |       |       |       |                      |       |       |       |       |    |
| 3 <i>nidorosum</i> _KK381-08         | 0.000              | 0.000 |       |       |       |       |       |                      |       |       |       |       |    |
| 4 <i>nidorosum</i> _JHP-380          | 0.004              | 0.004 | 0.004 |       |       |       |       |                      |       |       |       |       |    |
| 5 <i>nidorosum</i> _KK1670-12        | 0.007              | 0.007 | 0.007 | 0.001 |       |       |       |                      |       |       |       |       |    |
| 6 <i>nidorosum</i> _KK415-12         | 0.005              | 0.005 | 0.005 | 0.000 | 0.001 |       |       |                      |       |       |       |       |    |
| 7 <i>nidorosum</i> _KK268-08         | 0.005              | 0.005 | 0.005 | 0.000 | 0.001 | 0.000 |       |                      |       |       |       |       |    |
| 8 <i>nidorosum</i> _KK419-12         | 0.005              | 0.005 | 0.005 | 0.000 | 0.001 | 0.000 | 0.000 |                      |       |       |       |       |    |
| 9 <i>rhodopolium</i> _KK177-14       | 0.015              | 0.015 | 0.015 | 0.016 | 0.019 | 0.017 | 0.017 | 0.017                |       |       |       |       |    |
| 10 <i>rhodopolium</i> _KAlho24IX1980 | 0.015              | 0.015 | 0.015 | 0.016 | 0.019 | 0.018 | 0.018 | 0.018                | 0.000 |       |       |       |    |
| 11 <i>rhodopolium</i> _KK157-14      | 0.015              | 0.015 | 0.015 | 0.016 | 0.019 | 0.017 | 0.017 | 0.017                | 0.000 | 0.000 |       |       |    |
| 12 <i>rhodopolium</i> _KK1664-12     | 0.015              | 0.015 | 0.015 | 0.016 | 0.019 | 0.017 | 0.017 | 0.017                | 0.000 | 0.000 | 0.000 |       |    |
| 13 <i>rhodopolium</i> _neo-KK213-14  | 0.015              | 0.015 | 0.015 | 0.016 | 0.019 | 0.017 | 0.017 | 0.017                | 0.000 | 0.000 | 0.000 | 0.000 |    |

1.6 ± 0.1 (%)  
(*nidorosum* vs *rhodopolium*)

**Figure 3S.** *P*-distance between the known and new species estimated by MEGA software (*a-d*).  
*a*, *p*-distance between the known species.

*p*-distance between *E. lacus* and *E. majaloides*

(b)

|                               | <i>E.lacus</i> |       |       |       |       |       |       |       |       |       | <i>E.majaloides</i> |       |       |       |    |
|-------------------------------|----------------|-------|-------|-------|-------|-------|-------|-------|-------|-------|---------------------|-------|-------|-------|----|
|                               | 1              | 2     | 3     | 4     | 5     | 6     | 7     | 8     | 9     | 10    | 11                  | 12    | 13    | 14    | 15 |
| 1 KUB106                      |                |       |       |       |       |       |       |       |       |       |                     |       |       |       |    |
| 2 KUB108                      | 0.000          |       |       |       |       |       |       |       |       |       |                     |       |       |       |    |
| 3 KUB110                      | 0.000          | 0.000 |       |       |       |       |       |       |       |       |                     |       |       |       |    |
| 4 KUB113                      | 0.000          | 0.000 | 0.000 |       |       |       |       |       |       |       |                     |       |       |       |    |
| 5 KUB114                      | 0.000          | 0.000 | 0.000 | 0.000 |       |       |       |       |       |       |                     |       |       |       |    |
| 6 KUB104                      | 0.001          | 0.001 | 0.001 | 0.001 | 0.001 |       |       |       |       |       |                     |       |       |       |    |
| 7 KUB107                      | 0.001          | 0.001 | 0.001 | 0.001 | 0.001 | 0.000 |       |       |       |       |                     |       |       |       |    |
| 8 KUB109                      | 0.001          | 0.001 | 0.001 | 0.001 | 0.001 | 0.000 | 0.000 |       |       |       |                     |       |       |       |    |
| 9 KUB111                      | 0.001          | 0.001 | 0.001 | 0.001 | 0.001 | 0.000 | 0.000 | 0.000 |       |       |                     |       |       |       |    |
| 10 KUB105                     | 0.001          | 0.001 | 0.001 | 0.001 | 0.001 | 0.000 | 0.000 | 0.000 | 0.000 |       |                     |       |       |       |    |
| 11 majaloides_KK405-09        | 0.032          | 0.032 | 0.032 | 0.032 | 0.032 | 0.033 | 0.033 | 0.033 | 0.033 | 0.033 |                     |       |       |       |    |
| 12 majaloides_KK782-12        | 0.028          | 0.028 | 0.028 | 0.028 | 0.028 | 0.030 | 0.030 | 0.030 | 0.030 | 0.030 | 0.005               |       |       |       |    |
| 13 majaloides_KK887-06JVauras | 0.030          | 0.030 | 0.030 | 0.030 | 0.030 | 0.031 | 0.031 | 0.031 | 0.031 | 0.031 | 0.006               | 0.001 |       |       |    |
| 14 majaloides_KK54-14         | 0.031          | 0.031 | 0.031 | 0.031 | 0.031 | 0.032 | 0.032 | 0.032 | 0.032 | 0.032 | 0.015               | 0.011 | 0.012 |       |    |
| 15 majaloides_KK124-08JVauras | 0.030          | 0.030 | 0.030 | 0.030 | 0.030 | 0.031 | 0.031 | 0.031 | 0.031 | 0.031 | 0.013               | 0.009 | 0.010 | 0.007 |    |

*E. lacus*

3.1 ± 0.1 (%)  
(*lacus* vs *majaloides*)

**Figure 3S.** *P*-distance between the known and new species estimated by MEGA software (*a-d*).  
*b*, *p*-distance between *E. lacus* and *E. majaloides*.

p-distance between *E. subrhodopolium*, *E. sinuatum*, *E. nidorosum*, and *E. rhodopolium*

(c)

|                             | <i>E. subrhodopolium</i> |       |       |       |       |       |       |       |
|-----------------------------|--------------------------|-------|-------|-------|-------|-------|-------|-------|
|                             | 1                        | 2     | 3     | 4     | 5     | 6     | 7     | 8     |
| KUB3_seq1                   |                          |       |       |       |       |       |       |       |
| KUB3_seq2                   | 0.001                    |       |       |       |       |       |       |       |
| KUB123                      | 0.001                    | 0.000 |       |       |       |       |       |       |
| KUB130                      | 0.001                    | 0.000 | 0.000 |       |       |       |       |       |
| KUB132                      | 0.004                    | 0.005 | 0.005 | 0.005 |       |       |       |       |
| KUB1                        | 0.010                    | 0.005 | 0.005 | 0.005 | 0.006 |       |       |       |
| KUB124                      | 0.010                    | 0.005 | 0.005 | 0.005 | 0.006 | 0.000 |       |       |
| <i>E. rhodopolium</i> Er1   | 0.010                    | 0.005 | 0.005 | 0.005 | 0.006 | 0.000 | 0.000 |       |
| <i>E. sinuatum</i> st45     | 0.097                    | 0.071 | 0.070 | 0.070 | 0.070 | 0.072 | 0.073 | 0.073 |
| <i>E. sinuatum</i> st182    | 0.097                    | 0.071 | 0.070 | 0.070 | 0.070 | 0.072 | 0.073 | 0.073 |
| <i>E. sinuatum</i> H6003960 | 0.097                    | 0.071 | 0.070 | 0.070 | 0.070 | 0.072 | 0.073 | 0.073 |
| <i>emimens</i> holokK417-12 | 0.078                    | 0.079 | 0.079 | 0.079 | 0.079 | 0.084 | 0.084 | 0.084 |
| <i>emimens</i> KK40-14      | 0.076                    | 0.075 | 0.075 | 0.075 | 0.077 | 0.081 | 0.081 | 0.081 |

7.5 ± 0.9 (%)  
(subrhodopolium vs sinuatum)

7.9 ± 0.3 (%)  
(subrhodopolium vs emimens)

*E. subrhodopolium*

|                             | <i>E. nidorosum</i> |       |       |       |       |       |       |       | <i>E. rhodopolium</i> |       |       |       |       |  |
|-----------------------------|---------------------|-------|-------|-------|-------|-------|-------|-------|-----------------------|-------|-------|-------|-------|--|
|                             | 12                  | 13    | 14    | 15    | 16    | 17    | 18    | 19    | 20                    | 21    | 22    | 23    | 24    |  |
| KUB3_seq1                   | 0.095               | 0.093 | 0.093 | 0.094 | 0.098 | 0.091 | 0.092 | 0.092 | 0.097                 | 0.100 | 0.097 | 0.097 | 0.097 |  |
| KUB3_seq2                   | 0.092               | 0.091 | 0.091 | 0.090 | 0.093 | 0.088 | 0.088 | 0.088 | 0.095                 | 0.097 | 0.095 | 0.095 | 0.095 |  |
| KUB123                      | 0.092               | 0.091 | 0.091 | 0.090 | 0.093 | 0.088 | 0.088 | 0.088 | 0.095                 | 0.097 | 0.095 | 0.095 | 0.095 |  |
| KUB130                      | 0.092               | 0.091 | 0.091 | 0.090 | 0.093 | 0.088 | 0.088 | 0.088 | 0.095                 | 0.097 | 0.095 | 0.095 | 0.095 |  |
| KUB132                      | 0.099               | 0.098 | 0.098 | 0.099 | 0.103 | 0.096 | 0.096 | 0.096 | 0.099                 | 0.101 | 0.099 | 0.099 | 0.099 |  |
| KUB1                        | 0.095               | 0.093 | 0.093 | 0.093 | 0.096 | 0.091 | 0.091 | 0.091 | 0.096                 | 0.098 | 0.096 | 0.096 | 0.096 |  |
| KUB124                      | 0.095               | 0.093 | 0.093 | 0.093 | 0.096 | 0.091 | 0.091 | 0.091 | 0.096                 | 0.098 | 0.096 | 0.096 | 0.096 |  |
| <i>E. rhodopolium</i> Er1   | 0.095               | 0.093 | 0.093 | 0.093 | 0.096 | 0.091 | 0.091 | 0.091 | 0.096                 | 0.098 | 0.096 | 0.096 | 0.096 |  |
| <i>E. sinuatum</i> st45     | 0.077               | 0.075 | 0.075 | 0.075 | 0.070 | 0.073 | 0.073 | 0.073 | 0.079                 | 0.080 | 0.079 | 0.079 | 0.079 |  |
| <i>E. sinuatum</i> st182    | 0.077               | 0.075 | 0.075 | 0.075 | 0.070 | 0.073 | 0.073 | 0.073 | 0.079                 | 0.080 | 0.079 | 0.079 | 0.079 |  |
| <i>E. sinuatum</i> H6003960 | 0.077               | 0.075 | 0.075 | 0.075 | 0.070 | 0.073 | 0.073 | 0.073 | 0.079                 | 0.080 | 0.079 | 0.079 | 0.079 |  |

9.3 ± 0.3 (%)  
(subrhodopolium vs nidorosum)

9.6 ± 0.2 (%)  
(subrhodopolium vs nidorosum)

**Figure 3S.** P-distance between the known and new species estimated by MEGA software (*a-d*).  
c, p-distance between *E. subrhodopolium*, *E. sinuatum*, *E. nidorosum*, and *E. rhodopolium*.



*p*-distance between *E. pseudorhodopolium*, *E. lupinum*, and *E. rhodopolium*

(d)

|                            | <i>E. pseudorhodopolium</i> |       |       |       |       |       |       |       |       |       |       |       |       | <i>E. lupinum</i> |    | <i>E. rhodopolium</i> |       |       |       |       |  |
|----------------------------|-----------------------------|-------|-------|-------|-------|-------|-------|-------|-------|-------|-------|-------|-------|-------------------|----|-----------------------|-------|-------|-------|-------|--|
|                            | 1                           | 2     | 3     | 4     | 5     | 6     | 7     | 8     | 9     | 10    | 11    | 12    | 13    | 14                | 15 | 16                    | 17    | 18    | 19    | 20    |  |
| KUB9                       |                             |       |       |       |       |       |       |       |       |       |       |       |       |                   |    | 0.123                 | 0.121 | 0.123 | 0.123 | 0.123 |  |
| KUB10                      | 0.006                       |       |       |       |       |       |       |       |       |       |       |       |       |                   |    | 0.123                 | 0.124 | 0.123 | 0.123 | 0.123 |  |
| KUB7                       | 0.006                       | 0.004 |       |       |       |       |       |       |       |       |       |       |       |                   |    | 0.119                 | 0.121 | 0.119 | 0.119 | 0.119 |  |
| KUB5                       | 0.006                       | 0.004 | 0.002 |       |       |       |       |       |       |       |       |       |       |                   |    | 0.121                 | 0.123 | 0.121 | 0.121 | 0.121 |  |
| KUB6                       | 0.005                       | 0.002 | 0.001 | 0.001 |       |       |       |       |       |       |       |       |       |                   |    | 0.119                 | 0.121 | 0.119 | 0.119 | 0.119 |  |
| KUB101 seq1                | 0.005                       | 0.002 | 0.001 | 0.001 | 0.000 |       |       |       |       |       |       |       |       |                   |    | 0.119                 | 0.121 | 0.119 | 0.119 | 0.119 |  |
| KUB101 seq2                | 0.005                       | 0.002 | 0.001 | 0.001 | 0.000 | 0.000 |       |       |       |       |       |       |       |                   |    | 0.119                 | 0.121 | 0.119 | 0.119 | 0.119 |  |
| KUB102                     | 0.005                       | 0.002 | 0.001 | 0.001 | 0.000 | 0.000 | 0.000 |       |       |       |       |       |       |                   |    | 0.119                 | 0.121 | 0.119 | 0.119 | 0.119 |  |
| KUB126                     | 0.005                       | 0.002 | 0.001 | 0.001 | 0.000 | 0.000 | 0.000 | 0.000 |       |       |       |       |       |                   |    | 0.119                 | 0.121 | 0.119 | 0.119 | 0.119 |  |
| KUB127 seq2                | 0.005                       | 0.002 | 0.001 | 0.001 | 0.000 | 0.000 | 0.000 | 0.000 | 0.000 |       |       |       |       |                   |    | 0.119                 | 0.121 | 0.119 | 0.119 | 0.119 |  |
| KUB128                     | 0.005                       | 0.002 | 0.001 | 0.001 | 0.000 | 0.000 | 0.000 | 0.000 | 0.000 | 0.000 |       |       |       |                   |    | 0.119                 | 0.121 | 0.119 | 0.119 | 0.119 |  |
| ectomycorrhizal P09083     | 0.005                       | 0.002 | 0.001 | 0.001 | 0.000 | 0.000 | 0.000 | 0.000 | 0.000 | 0.000 | 0.000 |       |       |                   |    | 0.119                 | 0.121 | 0.119 | 0.119 | 0.119 |  |
| KUB127 seq1                | 0.007                       | 0.005 | 0.004 | 0.002 | 0.002 | 0.002 | 0.002 | 0.002 | 0.002 | 0.002 | 0.002 | 0.002 |       |                   |    | 0.121                 | 0.123 | 0.121 | 0.121 | 0.121 |  |
| lupinum_holoKK13-14JVAuras | 0.052                       | 0.051 | 0.047 | 0.050 | 0.049 | 0.049 | 0.049 | 0.049 | 0.049 | 0.049 | 0.049 | 0.049 | 0.049 |                   |    | 0.101                 | 0.103 | 0.101 | 0.101 | 0.101 |  |
| lupinum_126-05             | 0.053                       | 0.053 | 0.048 | 0.050 | 0.049 | 0.049 | 0.049 | 0.049 | 0.049 | 0.049 | 0.049 | 0.049 | 0.049 | 0.001             |    | 0.101                 | 0.103 | 0.101 | 0.101 | 0.101 |  |

*E. pseudorhodopolium*

4.9 ± 0.1 (%)  
(*pseudorhodopolium* vs *lupinum*)

10.1 ± 0.1 (%)  
(*pseudorhodopolium* vs *rhodopolium*)

**Figure 3S.** P-distance between the known and new species estimated by MEGA software (a-d).  
d, p-distance between *E. pseudorhodopolium*, *E. lupinum*, and *E. rhodopolium*.

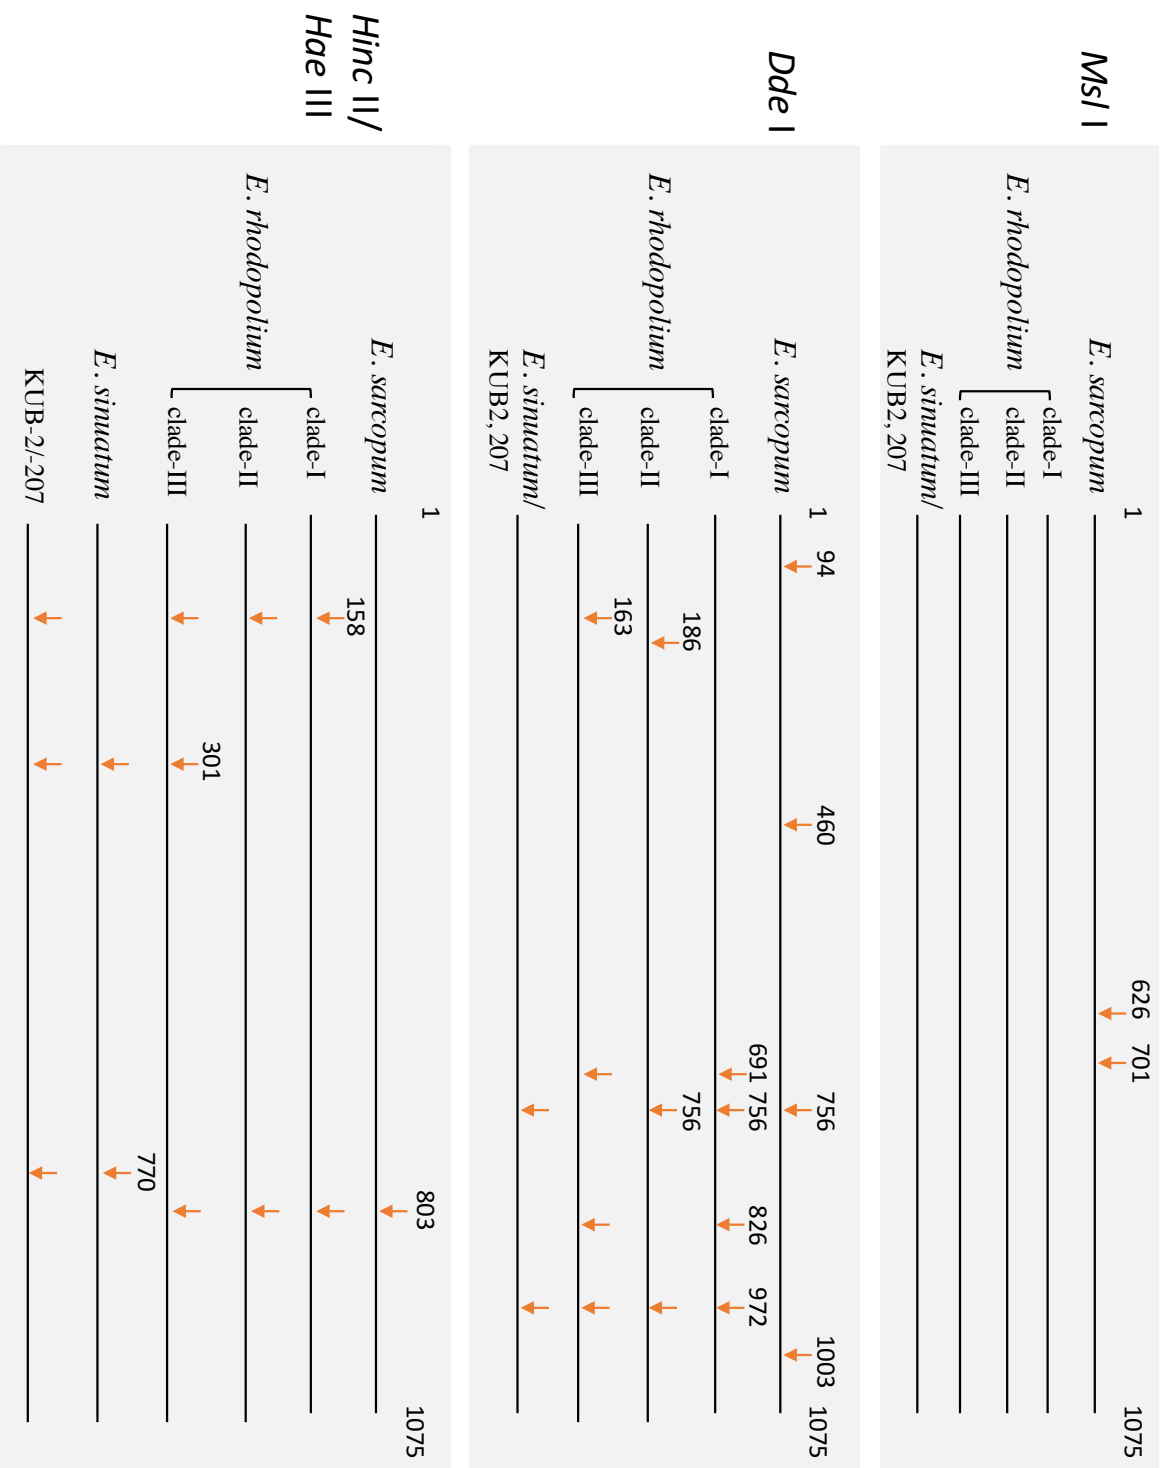

**Figure 4S** Restriction endonucleases were used for discrimination between edible and poisonous mushrooms and for species classification. MspI digestion revealed the presence of edible *E. sarcopinum*. Other *Entoloma* species were not digested. DdeI and a combination of HincII/HaeIII double digestion provide different band pattern between three clades of Japanese *E. rhodopolium*.

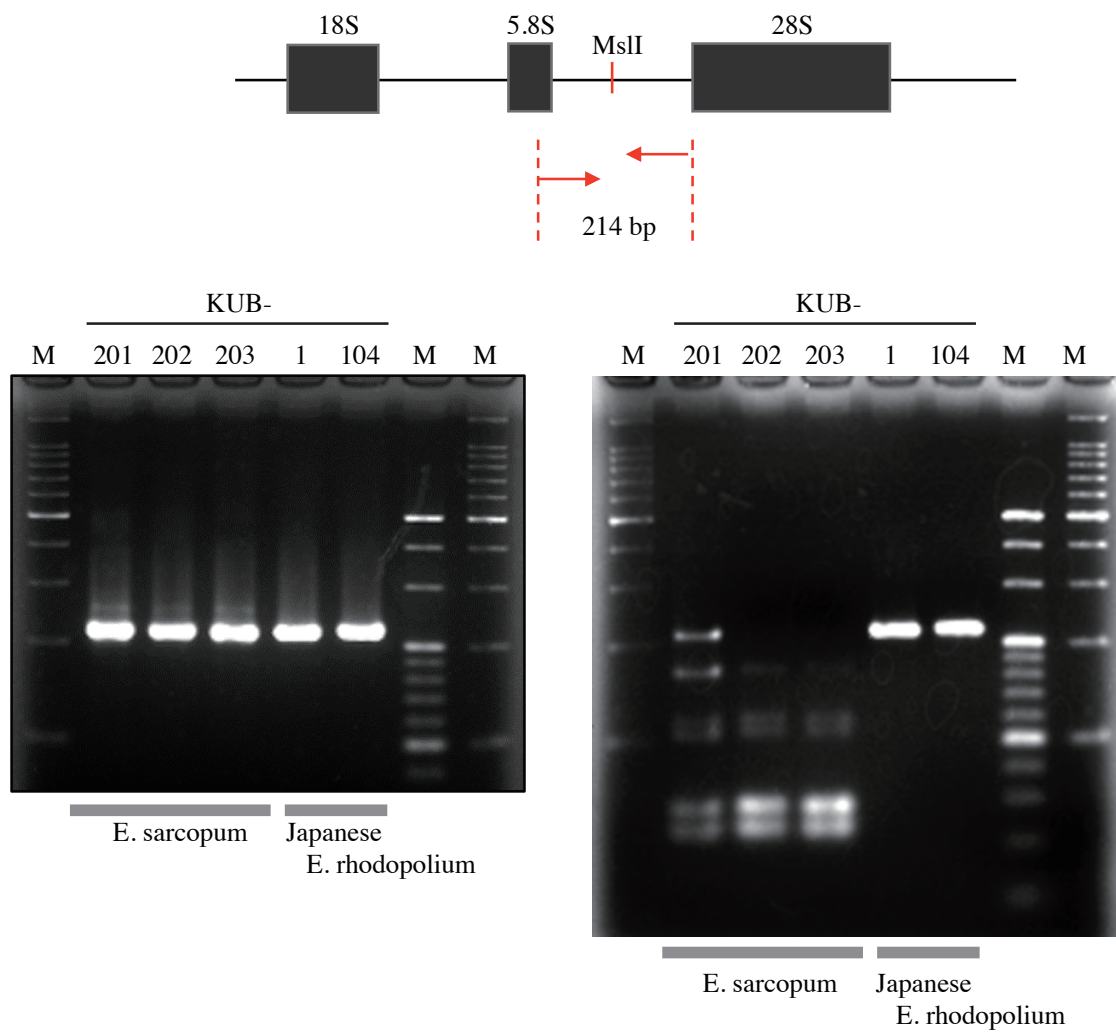

**Figure 5S.** Restriction endonucleases were used for discrimination between edible and poisonous mushrooms and for species classification. MspI digestion revealed the presence of edible *E. sarcopum*. Other *Entoloma* species were not digested. DdeI and a combination of HincII/HaeIII double digestion provide different band pattern between three clades of Japanese *E. rhodopolium*.

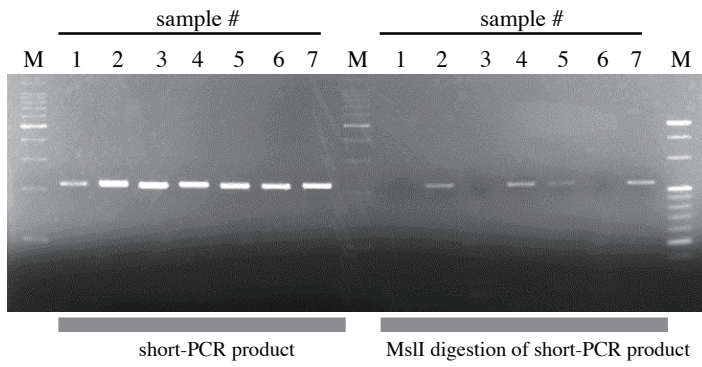

| quasi-mixed mushroom |        |                          |                    |
|----------------------|--------|--------------------------|--------------------|
| sample               | edible | <i>E. subrhodopolium</i> | <i>E. sarcopum</i> |
| 1                    | 400    | -                        | -                  |
| 2                    | -      | 200                      | -                  |
| 3                    | -      | -                        | 200                |
| 4                    | 200    | 200                      | -                  |
| 5                    | 200    | 100                      | 100                |
| 6                    | 200    | -                        | 200                |
| 7                    | 380    | 20                       | -                  |

**Figure 6S.** Detection of poisonous Japanese *E. rhodopolium* clades in quasi-mixed mushroom samples. A, content of each sample. B, band patterns on 2% agarose gel of samples 1 to 7. PCR products (214 bp) in samples 2, 4, 5, and 7 were left intact, whereas samples 1, 3, and 5 were completely digested. Experimental conditions were the same as that in Figure.6. Samples 2, 4, 5, and 7 contain poisonous *E. subrhodopolium*.
